# Supplementary material for: Emergence of heavy-fermion behavior and distorted square nets in partially vacancy-ordered Y4FexGe8 (1.0 ≤ x ≤ 1.5)
Source: Royal Society of Chemistry journal article supplement (doi:10.1039/d4tc03601h), 2024-11-07
Supplement: d4tc03601h1.pdf [file d4tc03601h1.pdf]

## Supplementary Information

### Emergence of heavy-fermion behavior and distorted square nets in partially vacancy-ordered $Y_4Fe_xGe_8$ ( $1.0 \leq x \leq 1.5$ )

Hengdi Zhao,<sup>1</sup> Xiuquan Zhou,<sup>1</sup> Mohammad Usman,<sup>1</sup> Ramakanta Chapai,<sup>1</sup> Lei Yu,<sup>2</sup> Jianguo Wen,<sup>2</sup> Hyowon Park,<sup>1,3</sup> Alexios P. Douvalis,<sup>4</sup> Patricia E. Meza,<sup>5</sup> Yu-Sheng Chen,<sup>6</sup> Ulrich Welp,<sup>1</sup> Stephan Rosenkranz,<sup>1</sup> Duck-Young Chung,<sup>1</sup> and Mercuri G. Kanatzidis\*<sup>1,7</sup>

<sup>1</sup>Materials Science Division, Argonne National Laboratory, 9700 South Cass Avenue, Lemont, IL 60439, USA

<sup>2</sup>Center for Nanoscale Materials, Argonne National Laboratory, 9700 South Cass Avenue, Lemont, IL 60439, USA

<sup>3</sup>Department of Physics, University of Illinois Chicago, Chicago, Illinois 60607, USA

<sup>4</sup>Department of Physics, University Ioannina, Ioannina, 45110, Greece

<sup>5</sup>Department of Material Science and Engineering, Northwestern University, Evanston, Illinois 60208, USA

<sup>6</sup>NSF's ChemMatCARS, the University of Chicago, 9700 South Cass Avenue, Lemont, Illinois 60439, USA

<sup>7</sup>Department of Chemistry, Northwestern University, Evanston, Illinois 60208, USA

\*corresponding author. [m-kanatzidis@northwestern.edu](mailto:m-kanatzidis@northwestern.edu)

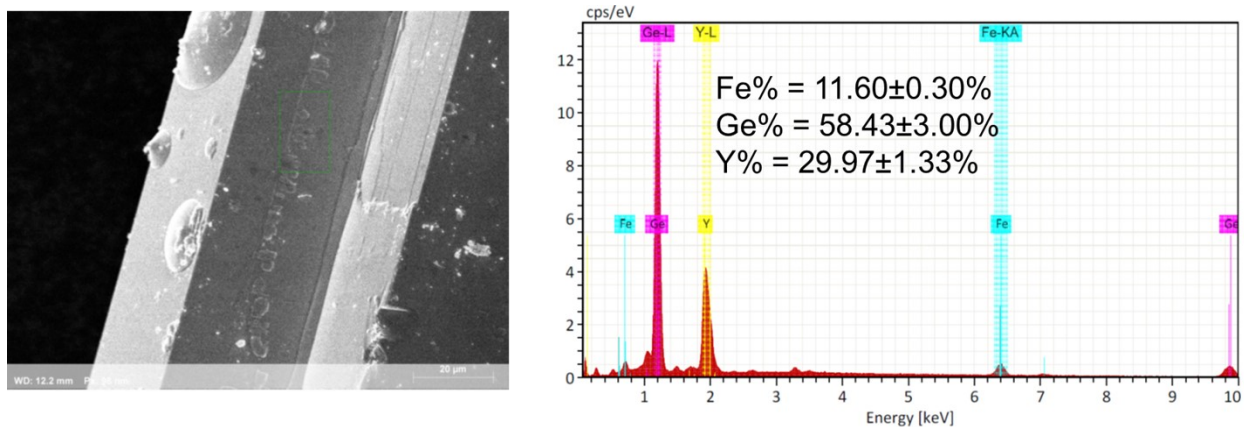

**Figure S1.** Elemental analysis for sample  $Y_4Fe_xGe_8$  using EDS. It gives a Y:Fe:Ge ratio of about 4:1.5:8, very close to our single crystal refinement ( $x = 1.44$ ) as shown in **Table 1**.

The CeNiSi<sub>2</sub>-type structure, which crystallizes in the orthorhombic *Cmcm* space group, restricts both the Ge-Ge square net to be perfect and the Fe-site to be centered (**Fig.S2a**). As observed in the Tb<sub>4</sub>FeGe<sub>8</sub>,<sup>1</sup> with only the Ge square-net distortion enabled, the Ge square-net distorts from rhombi to irregular quadrilaterals resulting in four distinct Ge-Ge distances for each Ge, breaking all mirror and glide planes of the space group *Cmcm* and thus lowering the symmetry down to monoclinic space group *P2<sub>1</sub>/n* (**Fig.S2b**). Note the Fe-site is still centered under this symmetry (**Fig.S2b**). By further allowing the Fe-site to move off-centered, as we have observed in the titled compound as well as in the Y<sub>4</sub>RuGe<sub>8</sub>,<sup>2</sup> the symmetry get further reduced down to triclinic space group *P-1* (**Fig.S2c**).

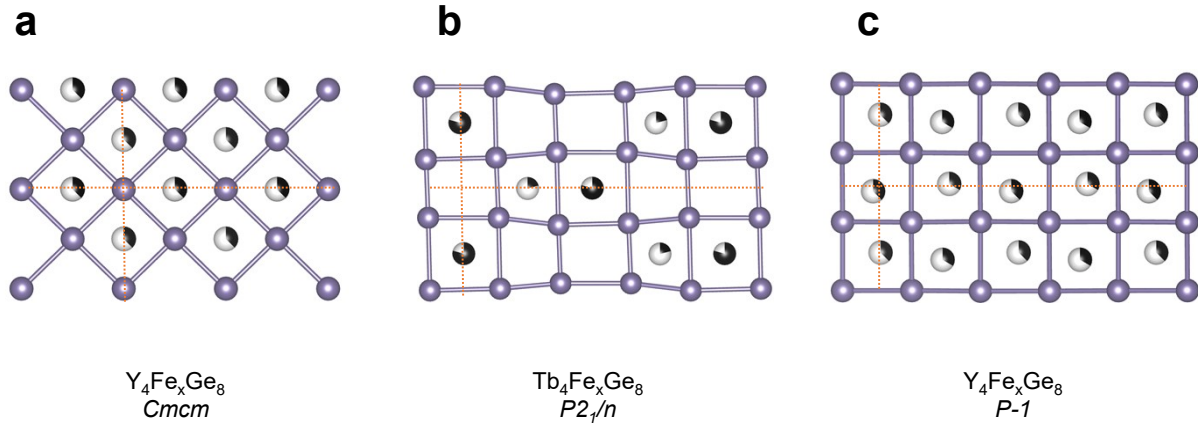

**Figure S2.** Schematic of the evolution of space group as a result of both Ge-Ge square net distortions and the Fe-site off-centering, with **a)** Y<sub>4</sub>Fe<sub>x</sub>Ge<sub>8</sub>, Orthorhombic space group *Cmcm*; **b)** Tb<sub>4</sub>FeGe<sub>8</sub>, monoclinic, space group *P2<sub>1</sub>/n* and **c)** Y<sub>4</sub>Fe<sub>x</sub>Ge<sub>8</sub>, triclinic space group *P-1*.

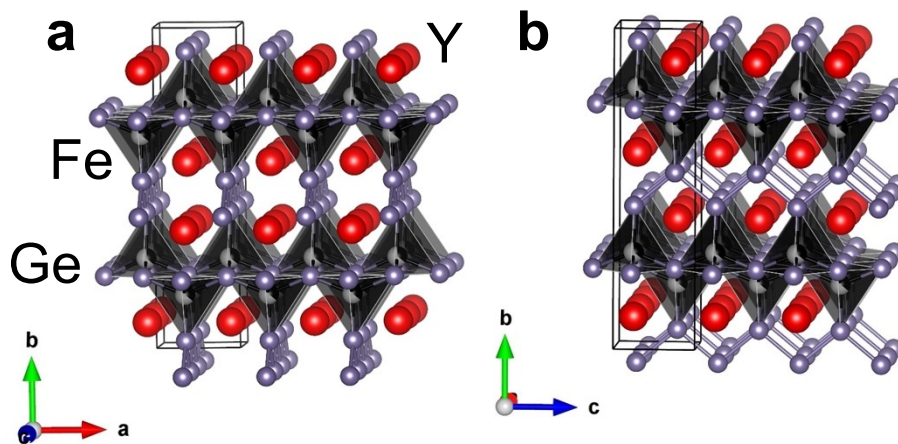

**Figure S3.** Crystal structures of  $Y_4Fe_xGe_8$ , crystallizing in a  $CeNiSi_2$ -type structure ( $Cmcm$  space group) viewing at **a)** the  $ab$ -plane and **b)** the  $bc$ -plane with  $FeGe_4$  tetrahedron.

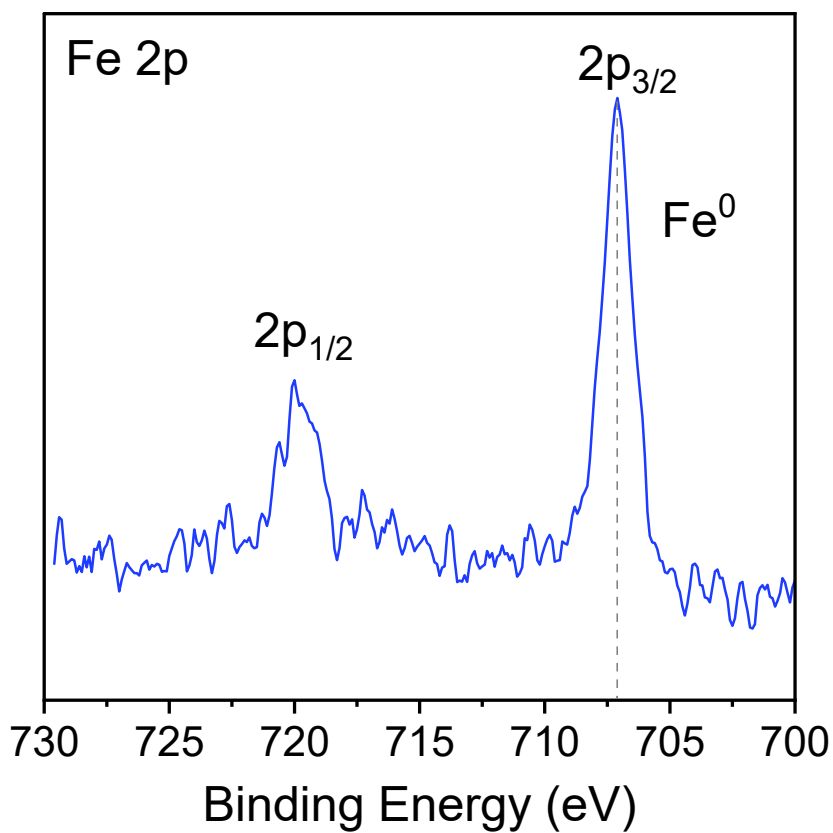

**Figure S4.** X-ray photoelectron spectroscopy (XPS) measurements of  $Y_4Fe_{1.44}Ge_8$

### Photoemission yield spectroscopy in air

PYSA measurements were taken on a Riken-Keiki AC-2 spectrometer. Thin film samples were scanned by tunable monochromatic ultraviolet light (UV, 4.2-6.2 eV) under dry air, and emitted photoelectron counts were measured at each excitation energy using an accelerating voltage of 2980 V with a counting time of ten seconds and a step size of 0.1 eV. A detector dead-time of

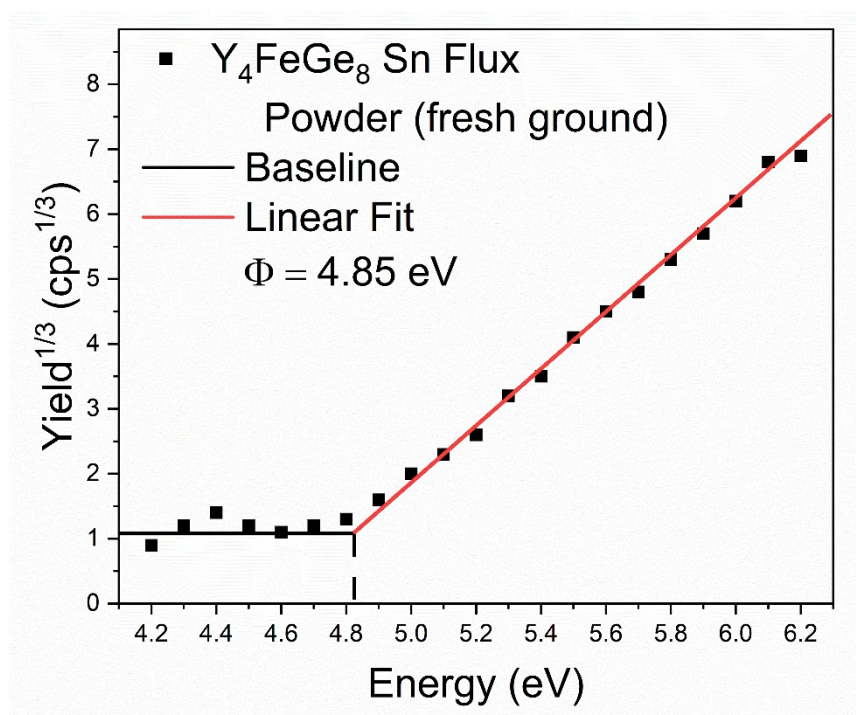

**Figure S5.** Photoemission yield spectroscopy in air (PYSA) measurements of  $Y_4Fe_xGe_8$  performed with freshly ground powder.

5.6 ms was used, allowing a maximum counting rate of 1785/s. Maximum signal-to-noise ratio was obtained by setting the UV intensity to 300 nW for crystals and 200 nW for power, and a quantity-of-light correction was used to account for variations in UV lamp intensity across the energy range. First ionization energies of  $Y_4Fe_xGe_8$  samples were determined by plotting the third root of photoelectron count rate against excitation energy, and a linear regression was used to determine the onset energy of above-baseline photoelectron flux. The negative of this onset energy was used as an approximation of the energetic position of the valence band maximum in the sample.

PYSA measurements performed on single crystals had apparent ionization energy of 5.47 eV, but freshly ground powder showed a shallower ionization energy of 4.85 eV. Re-measuring the same powder sample after 5 days in air yielded an apparent ionization energy of 5.11 eV. These values are consistent with surface oxidization of the starting crystals and the air-exposed powder. However, the ionization energy of the freshly ground powder (4.85 eV) is likely the closest approximation of the true work function of  $Y_4FeGe_8$ .

### **Magnetic Susceptibility Data for $Y_4Fe_xGe_8$ samples synthesized via Direct-Combination Method**

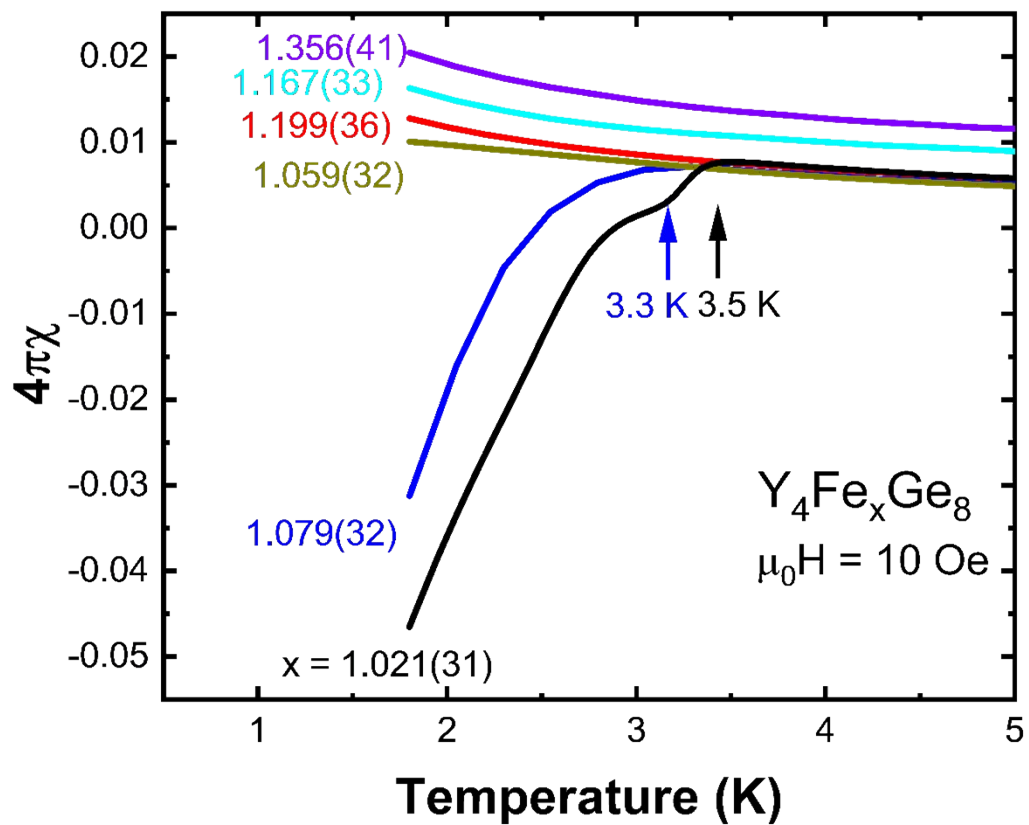

**Figure S6.** Zero-Field-Cooled (ZFC) volume magnetic susceptibility of selected Y<sub>4</sub>Fe<sub>x</sub>Ge<sub>8</sub> synthesized via direct-combination method with no indium/tin involved.

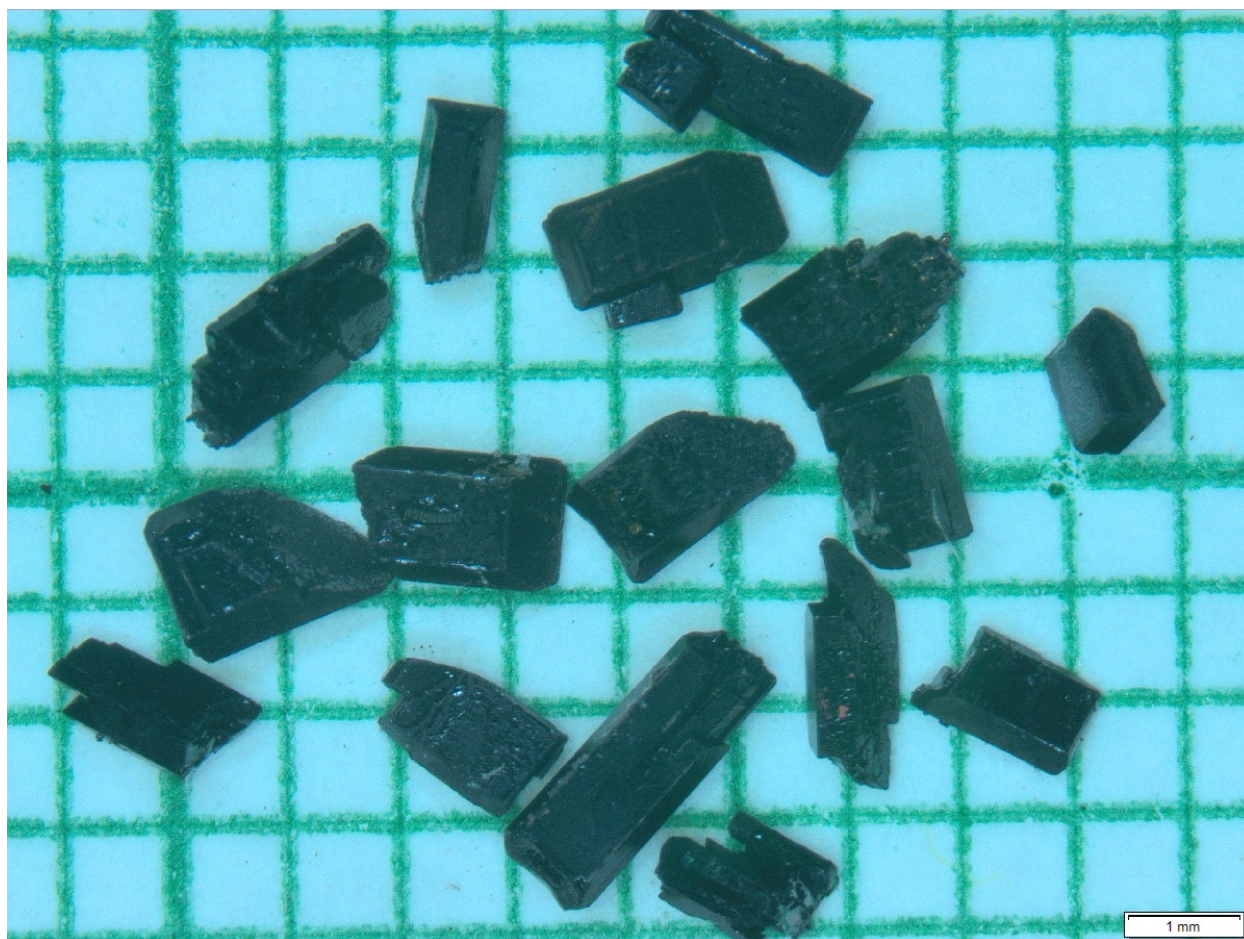

**Figure S7.** Typical size of single crystals  $Y_4Fe_xGe_8$  ( $1.0 \leq x \leq 1.5$ ) synthesized with the metal flux method.



**Table S1.** Single crystal diffraction data of  $Y_4Fe_{1.44}Ge_8$  in the space group *Cmcm* (column 2 in Table 1) collected using a laboratory single crystal x-ray diffractometer.

|                                             |                                                          |
|---------------------------------------------|----------------------------------------------------------|
| Empirical formula                           | $Fe_{1.44}Ge_8Y_4$                                       |
| Formula weight                              | 1016.78                                                  |
| Temperature/K                               | 296.15                                                   |
| Crystal system                              | orthorhombic                                             |
| Space group                                 | <i>Cmcm</i>                                              |
| a/Å                                         | 4.1384(2)                                                |
| b/Å                                         | 15.8468(8)                                               |
| c/Å                                         | 4.0178(2)                                                |
| Volume/Å <sup>3</sup>                       | 263.49(2)                                                |
| Z                                           | 1                                                        |
| $\rho_{calc}/\text{g}/\text{cm}^3$          | 6.408                                                    |
| $\mu/\text{mm}^{-1}$                        | 46.023                                                   |
| F(000)                                      | 449.0                                                    |
| Radiation                                   | MoK $\alpha$ ( $\lambda = 0.71073$ Å)                    |
| 2 $\Theta$ range for data collection/°      | 5.142 to 60.956                                          |
| Index ranges                                | $-5 \leq h \leq 5, -22 \leq k \leq 22, -5 \leq l \leq 5$ |
| Reflections collected                       | 4690                                                     |
| Independent reflections                     | 255 [ $R_{int} = 0.0298, R_{sigma} = 0.0101$ ]           |
| Data/restraints/parameters                  | 255/0/19                                                 |
| Goodness-of-fit on F <sup>2</sup>           | 1.135                                                    |
| Final R indexes [ $I \geq 2\sigma(I)$ ]     | $R_1 = 0.0138, wR_2 = 0.0293$                            |
| Final R indexes [all data]                  | $R_1 = 0.0150, wR_2 = 0.0298$                            |
| Largest diff. peak/hole / e Å <sup>-3</sup> | 0.96/-0.76                                               |

$$R = \frac{\sum ||F_o| - |F_c||}{\sum |F_o|}, wR = \left\{ \frac{\sum [w(|F_o|^2 - |F_c|^2)^2]}{\sum [w(|F_o|^4)]} \right\}^{1/2} \text{ and } w = 1 / [\sigma^2(F_o^2) + (0.0319P)^2 + 0.46P] \text{ where } P = (F_o^2 + 2F_c^2) / 3$$

**Table S1 extended.** Fractional Atomic Coordinates ( $\times 10^4$ ) and Equivalent Isotropic

Displacement Parameters ( $\text{\AA}^2 \times 10^3$ ).  $U_{\text{eq}}$  is defined as 1/3 of of the trace of the orthogonalised  $U_{ij}$  tensor.

| Atom | x    | y          | z     | U(eq)     |
|------|------|------------|-------|-----------|
| Y001 | 5000 | 3972.8(2)  | 7500  | 7.91(12)  |
| Ge00 | 0    | 4476.6(3)  | 2500  | 10.81(13) |
| Ge1  | 0    | 2517.5(3)  | -2500 | 27.37(16) |
| Fe04 | 0    | 3030.8(10) | 2500  | 13.0(5)   |

**Table S1 extended.** Anisotropic Displacement Parameters ( $\text{\AA}^2 \times 10^3$ ). The Anisotropic displacement factor exponent takes the form:  $-2\pi^2[h^2a^2U_{11}+2hka^*b^*U_{12}+\dots]$ .

| Atom | $U_{11}$ | $U_{22}$ | $U_{33}$ | $U_{23}$ | $U_{13}$ | $U_{12}$ |
|------|----------|----------|----------|----------|----------|----------|
| Y001 | 7.11(18) | 7.33(18) | 9.30(19) | 0        | 0        | 0        |
| Ge00 | 6.6(2)   | 19.0(2)  | 6.8(2)   | 0        | 0        | 0        |
| Ge1  | 25.9(3)  | 17.3(3)  | 39.0(3)  | 0        | 0        | 0        |
| Fe04 | 14.8(8)  | 7.3(8)   | 16.7(9)  | 0        | 0        | 0        |

**Table S1 extended.** Bond Lengths.

| Atom | Atom              | Length/ $\text{\AA}$ | Atom | Atom               | Length/ $\text{\AA}$ |
|------|-------------------|----------------------|------|--------------------|----------------------|
| Y001 | Ge00              | 2.99243(19)          | Ge00 | Ge00 <sup>2</sup>  | 2.6052(6)            |
| Y001 | Ge00 <sup>1</sup> | 3.2123(4)            | Ge00 | Ge00 <sup>8</sup>  | 2.6052(6)            |
| Y001 | Ge00 <sup>2</sup> | 3.2123(4)            | Ge00 | Fe04               | 2.2911(15)           |
| Y001 | Ge00 <sup>3</sup> | 2.99244(19)          | Ge1  | Ge1 <sup>9</sup>   | 2.88450(10)          |
| Y001 | Ge00 <sup>4</sup> | 2.99244(19)          | Ge1  | Ge1 <sup>10</sup>  | 2.88450(10)          |
| Y001 | Ge00 <sup>5</sup> | 2.99244(18)          | Ge1  | Ge1 <sup>11</sup>  | 2.88450(10)          |
| Y001 | Ge1 <sup>6</sup>  | 3.1005(5)            | Ge1  | Ge1 <sup>6</sup>   | 2.88450(10)          |
| Y001 | Ge1 <sup>3</sup>  | 3.0984(5)            | Ge1  | Fe04 <sup>12</sup> | 2.1673(6)            |
| Y001 | Ge1 <sup>4</sup>  | 3.0984(5)            | Ge1  | Fe04 <sup>11</sup> | 2.2442(6)            |
| Y001 | Ge1 <sup>7</sup>  | 3.1005(5)            | Ge1  | Fe04 <sup>6</sup>  | 2.2442(6)            |
| Y001 | Fe04 <sup>7</sup> | 3.1751(16)           | Ge1  | Fe04               | 2.1673(6)            |
| Y001 | Fe04              | 3.2474(7)            |      |                    |                      |

**Table S2.** Single crystal diffraction data of  $\text{Y}_4\text{Fe}_{1.44}\text{Ge}_8$  in the space group  $P-1$  (column 3 in Table 1) collected using a laboratory single crystal x-ray diffractometer.

|                                                |                                                               |
|------------------------------------------------|---------------------------------------------------------------|
| Empirical formula                              | $\text{Fe}_{2.87}\text{Ge}_{16}\text{Y}_8$                    |
| Formula weight                                 | 2033.01                                                       |
| Temperature/K                                  | 296.15                                                        |
| Crystal system                                 | triclinic                                                     |
| Space group                                    | $P-1$                                                         |
| $a/\text{\AA}$                                 | 5.7716(3)                                                     |
| $b/\text{\AA}$                                 | 8.1916(4)                                                     |
| $c/\text{\AA}$                                 | 11.5363(5)                                                    |
| $\alpha/^\circ$                                | 79.5610(10)                                                   |
| $\beta/^\circ$                                 | 88.3050(10)                                                   |
| $\gamma/^\circ$                                | 79.5490(10)                                                   |
| Volume/ $\text{\AA}^3$                         | 527.49(4)                                                     |
| Z                                              | 1                                                             |
| $\rho_{\text{calc}}/\text{g/cm}^3$             | 6.400                                                         |
| $\mu/\text{mm}^{-1}$                           | 45.972                                                        |
| F(000)                                         | 899.0                                                         |
| Radiation                                      | MoK $\alpha$ ( $\lambda = 0.71073 \text{ \AA}$ )              |
| $2\Theta$ range for data collection/ $^\circ$  | 3.59 to 70.32                                                 |
| Index ranges                                   | $-9 \leq h \leq 9, -13 \leq k \leq 13, -18 \leq l \leq 18$    |
| Reflections collected                          | 23168                                                         |
| Independent reflections                        | 4508 [ $R_{\text{int}} = 0.0532, R_{\text{sigma}} = 0.0501$ ] |
| Data/restraints/parameters                     | 4508/0/150                                                    |
| Goodness-of-fit on $F^2$                       | 0.946                                                         |
| Final R indexes [ $I \geq 2\sigma(I)$ ]        | $R_1 = 0.0307, wR_2 = 0.0749$                                 |
| Final R indexes [all data]                     | $R_1 = 0.1473, wR_2 = 0.1091$                                 |
| Largest diff. peak/hole / $e \text{ \AA}^{-3}$ | 1.27/-1.40                                                    |

$$R = \frac{\sum ||F_o| - |F_c||}{\sum |F_o|}, wR = \left\{ \frac{\sum [w(|F_o|^2 - |F_c|^2)^2]}{\sum [w(|F_o|^4)]} \right\}^{1/2} \text{ and } w = 1/[\sigma^2(F_o^2) + (0.0315P)^2]$$

where  $P = (F_o^2 + 2F_c^2)/3$

**Table S2 extended.** Fractional Atomic Coordinates ( $\times 10^4$ ) and Equivalent Isotropic Displacement Parameters ( $\text{\AA}^2 \times 10^3$ ).  $U_{\text{eq}}$  is defined as 1/3 of the trace of the orthogonalised  $U_{\text{IJ}}$  tensor.

| Atom | <i>x</i>  | <i>y</i> | <i>z</i>   | $U(\text{eq})$ |
|------|-----------|----------|------------|----------------|
| Y001 | -3232(3)  | 7940(2)  | 7132.0(19) | 8.5(4)         |
| Y002 | -3237(3)  | 7943(2)  | 2129.5(19) | 8.2(4)         |
| Y003 | 8236(3)   | 2055(2)  | 366.3(17)  | 8.5(4)         |
| Ge00 | 13487(4)  | 1045(3)  | 493(2)     | 10.9(5)        |
| Y005 | 1762(3)   | 7951(2)  | 4631.2(17) | 8.1(4)         |
| Ge1  | 8480(3)   | 1054(3)  | 2993.9(19) | 11.4(5)        |
| Ge2  | 1501(3)   | 8956(3)  | 2005.9(19) | 10.6(5)        |
| Ge3  | -3488(4)  | 8959(3)  | 4505(2)    | 11.4(5)        |
| Ge4  | -25(5)    | 5033(3)  | 3746(2)    | 28.4(7)        |
| Ge5  | 10007(5)  | 4966(3)  | 1254(3)    | 28.4(7)        |
| Ge6  | 5016(5)   | 5031(3)  | 1246(3)    | 27.5(6)        |
| Ge7  | 5021(5)   | 4952(3)  | 3755(3)    | 26.9(6)        |
| Fe0D | -2753(13) | 6059(9)  | 4875(8)    | 7(2)           |
| Fe0E | 7772(15)  | 3931(10) | 2627(8)    | 24(3)          |
| Fe0F | 2218(12)  | 6080(8)  | 2364(8)    | 14(2)          |
| Fe0G | 12747(15) | 3956(10) | 141(7)     | 12(2)          |

**Table S2 extended.** Anisotropic Displacement Parameters ( $\text{\AA}^2 \times 10^3$ ). The Anisotropic displacement factor exponent takes the form:  $-2\pi^2[h^2a^*2U_{11}+2hka^*b^*U_{12}+\dots]$ .

| Atom | $U_{11}$ | $U_{22}$ | $U_{33}$ | $U_{23}$ | $U_{13}$ | $U_{12}$ |
|------|----------|----------|----------|----------|----------|----------|
| Y001 | 8.1(9)   | 8.1(8)   | 8.8(10)  | -2.3(7)  | -2.9(7)  | 0.9(7)   |
| Y002 | 9.1(9)   | 6.3(8)   | 9.2(10)  | -0.6(7)  | -0.1(8)  | -1.7(7)  |
| Y003 | 7.3(10)  | 8.4(8)   | 9.9(11)  | -2.4(8)  | -1.8(8)  | -0.4(7)  |
| Ge00 | 7.8(10)  | 19.1(11) | 6.6(11)  | -3.1(9)  | 0.3(9)   | -3.7(8)  |
| Y005 | 9.0(10)  | 7.8(8)   | 7.8(11)  | -1.4(8)  | -0.6(8)  | -2.0(7)  |
| Ge1  | 6.1(10)  | 22.7(11) | 6.1(12)  | -4.8(9)  | 1.1(9)   | -2.8(9)  |
| Ge2  | 6.8(10)  | 17.2(10) | 7.9(12)  | -2.6(9)  | -0.3(9)  | -1.9(8)  |
| Ge3  | 6.9(10)  | 19.1(11) | 9.2(12)  | -4.4(9)  | -0.7(9)  | -2.7(8)  |
| Ge4  | 36.2(17) | 17.0(12) | 31.2(17) | -2.6(12) | -7.2(14) | -3.3(11) |
| Ge5  | 33.6(16) | 18.4(12) | 33.6(18) | -5.7(12) | -8.9(13) | -3.3(11) |
| Ge6  | 33.1(15) | 16.7(11) | 31.8(17) | -3.2(11) | -6.1(13) | -2.3(10) |
| Ge7  | 30.6(15) | 17.5(11) | 30.4(16) | -2.3(11) | -6.3(12) | 0.4(10)  |
| Fe0D | 5(4)     | -1(3)    | 15(5)    | -1(3)    | -2(3)    | 0(3)     |
| Fe0E | 29(5)    | 27(4)    | 15(5)    | 2(3)     | -5(4)    | -11(4)   |
| Fe0F | 7(4)     | 9(3)     | 28(5)    | -10(3)   | -1(3)    | 4(3)     |
| Fe0G | 19(5)    | 9(4)     | 8(5)     | 0(3)     | 1(3)     | -2(3)    |

**Table S2 extended.** Bond Lengths.

| Atom | Atom               | Length/Å | Atom | Atom               | Length/Å  |
|------|--------------------|----------|------|--------------------|-----------|
| Y001 | Ge00 <sup>1</sup>  | 2.996(3) | Y005 | Ge3 <sup>3</sup>   | 3.206(3)  |
| Y001 | Ge1 <sup>2</sup>   | 2.992(3) | Y005 | Ge3                | 2.993(3)  |
| Y001 | Ge1 <sup>1</sup>   | 2.996(3) | Y005 | Ge3 <sup>13</sup>  | 2.995(3)  |
| Y001 | Ge2 <sup>3</sup>   | 3.217(3) | Y005 | Ge4                | 3.108(3)  |
| Y001 | Ge3 <sup>4</sup>   | 3.214(3) | Y005 | Ge4 <sup>2</sup>   | 3.100(3)  |
| Y001 | Ge3                | 2.995(3) | Y005 | Ge7                | 3.116(3)  |
| Y001 | Ge4 <sup>2</sup>   | 3.100(3) | Y005 | Ge7 <sup>1</sup>   | 3.093(3)  |
| Y001 | Ge5 <sup>1</sup>   | 3.097(3) | Y005 | Fe0D <sup>2</sup>  | 3.178(7)  |
| Y001 | Ge6 <sup>2</sup>   | 3.103(3) | Y005 | Fe0F               | 3.244(8)  |
| Y001 | Ge7 <sup>2</sup>   | 3.090(3) | Ge1  | Ge2 <sup>10</sup>  | 2.607(2)  |
| Y001 | Fe0D               | 3.238(9) | Ge1  | Ge3 <sup>10</sup>  | 2.604(3)  |
| Y001 | Fe0F <sup>2</sup>  | 3.186(7) | Ge1  | Fe0E               | 2.280(8)  |
| Y002 | Ge00 <sup>5</sup>  | 2.989(3) | Ge2  | Fe0F               | 2.280(7)  |
| Y002 | Ge00 <sup>6</sup>  | 3.213(3) | Ge3  | Ge3 <sup>4</sup>   | 2.601(4)  |
| Y002 | Ge1 <sup>7</sup>   | 3.219(3) | Ge3  | Fe0D               | 2.298(7)  |
| Y002 | Ge2 <sup>8</sup>   | 3.000(3) | Ge4  | Ge4 <sup>2</sup>   | 2.886(6)  |
| Y002 | Ge2                | 2.991(3) | Ge4  | Ge5 <sup>8</sup>   | 2.884(3)  |
| Y002 | Ge3                | 2.997(3) | Ge4  | Ge7 <sup>8</sup>   | 2.872(3)  |
| Y002 | Ge4                | 3.096(3) | Ge4  | Ge7                | 2.901(3)  |
| Y002 | Ge5 <sup>8</sup>   | 3.098(3) | Ge4  | Fe0D               | 2.163(8)  |
| Y002 | Ge6 <sup>8</sup>   | 3.092(3) | Ge4  | Fe0D <sup>2</sup>  | 2.241(9)  |
| Y002 | Ge7 <sup>8</sup>   | 3.106(3) | Ge4  | Fe0E <sup>8</sup>  | 2.243(9)  |
| Y002 | Fe0E <sup>8</sup>  | 3.180(8) | Ge4  | Fe0F               | 2.176(8)  |
| Y002 | Fe0F               | 3.236(7) | Ge5  | Ge5 <sup>11</sup>  | 2.884(6)  |
| Y003 | Ge00 <sup>8</sup>  | 2.996(3) | Ge5  | Ge6 <sup>13</sup>  | 2.901(3)  |
| Y003 | Ge00               | 2.994(3) | Ge5  | Ge6                | 2.871(3)  |
| Y003 | Ge00 <sup>9</sup>  | 3.210(3) | Ge5  | Fe0E               | 2.163(9)  |
| Y003 | Ge1                | 2.994(3) | Ge5  | Fe0F <sup>13</sup> | 2.246(9)  |
| Y003 | Ge2 <sup>5</sup>   | 2.992(3) | Ge5  | Fe0G <sup>11</sup> | 2.241(9)  |
| Y003 | Ge2 <sup>10</sup>  | 3.210(3) | Ge5  | Fe0G               | 2.150(9)  |
| Y003 | Ge5                | 3.100(3) | Ge6  | Ge6 <sup>5</sup>   | 2.884(6)  |
| Y003 | Ge5 <sup>11</sup>  | 3.100(3) | Ge6  | Ge7                | 2.883(3)  |
| Y003 | Ge6 <sup>5</sup>   | 3.107(3) | Ge6  | Fe0E               | 2.234(9)  |
| Y003 | Ge6                | 3.093(3) | Ge6  | Fe0F               | 2.188(8)  |
| Y003 | Fe0F <sup>5</sup>  | 3.238(9) | Ge6  | Fe0G <sup>11</sup> | 2.168(8)  |
| Y003 | Fe0G <sup>11</sup> | 3.162(8) | Ge6  | Fe0G <sup>8</sup>  | 2.245(10) |
| Ge00 | Ge00 <sup>12</sup> | 2.603(4) | Ge7  | Ge7 <sup>1</sup>   | 2.888(6)  |
| Ge00 | Ge2 <sup>10</sup>  | 2.607(3) | Ge7  | Fe0D <sup>13</sup> | 2.256(9)  |

|      |                  |          |     |                   |          |
|------|------------------|----------|-----|-------------------|----------|
| Ge00 | Fe0G             | 2.308(8) | Ge7 | Fe0D <sup>2</sup> | 2.167(8) |
| Y005 | Ge1 <sup>7</sup> | 3.216(3) | Ge7 | Fe0E              | 2.168(9) |
| Y005 | Ge1 <sup>1</sup> | 2.989(3) | Ge7 | Fe0F              | 2.262(8) |
| Y005 | Ge2              | 2.992(3) |     |                   |          |

**Table S3.** Single crystal diffraction data of  $Y_4Fe_xGe_8$  in the space group  $P-1$  collected using synchrotron X-rays at 15-IDB (NSF's ChemMatCARS at the Advanced Photon Source).

|                                                |                                                                |
|------------------------------------------------|----------------------------------------------------------------|
| Empirical formula                              | $FeGe_{7.27}Y_{4.12}$                                          |
| Formula weight                                 | 950.84                                                         |
| Temperature/K                                  | 273.15                                                         |
| Crystal system                                 | triclinic                                                      |
| Space group                                    | $P-1$                                                          |
| $a/\text{\AA}$                                 | 11.4441(3)                                                     |
| $b/\text{\AA}$                                 | 32.7356(7)                                                     |
| $c/\text{\AA}$                                 | 11.4456(3)                                                     |
| $\alpha/^\circ$                                | 79.6330(10)                                                    |
| $\beta/^\circ$                                 | 88.3300(10)                                                    |
| $\gamma/^\circ$                                | 79.6350(10)                                                    |
| Volume/ $\text{\AA}^3$                         | 4149.01(18)                                                    |
| Z                                              | 16                                                             |
| $\rho_{\text{calc}}/\text{g/cm}^3$             | 6.089                                                          |
| $\mu/\text{mm}^{-1}$                           | 44.801                                                         |
| F(000)                                         | 6716.0                                                         |
| Radiation                                      | Synchrotron X-rays ( $\lambda = 0.41328 \text{ \AA}$ )         |
| $2\Theta$ range for data collection/ $^\circ$  | 2.57 to 72.638                                                 |
| Index ranges                                   | $-19 \leq h \leq 19, -54 \leq k \leq 54, -18 \leq l \leq 19$   |
| Reflections collected                          | 211855                                                         |
| Independent reflections                        | 38527 [ $R_{\text{int}} = 0.0667, R_{\text{sigma}} = 0.0640$ ] |
| Data/restraints/parameters                     | 38527/0/1258                                                   |
| Goodness-of-fit on $F^2$                       | 0.900                                                          |
| Final R indexes [ $I \geq 2\sigma(I)$ ]        | $R_1 = 0.0844, wR_2 = 0.3076$                                  |
| Final R indexes [all data]                     | $R_1 = 0.3148, wR_2 = 0.5523$                                  |
| Largest diff. peak/hole / $e \text{ \AA}^{-3}$ | 16.01/-2.72                                                    |

**Table S3 extended.** Fractional Atomic Coordinates ( $\times 10^4$ ) and Equivalent Isotropic Displacement Parameters ( $\text{\AA}^2 \times 10^3$ ).  $U_{\text{eq}}$  is defined as 1/3 of the trace of the orthogonalised  $U_{ij}$  tensor.

| Atom | $x$ | $y$ | $z$ | $U(\text{eq})$ |
|------|-----|-----|-----|----------------|
|------|-----|-----|-----|----------------|

**Table S3 extended.** Fractional Atomic Coordinates ( $\times 10^4$ ) and Equivalent Isotropic Displacement Parameters ( $\text{\AA}^2 \times 10^3$ ).  $U_{\text{eq}}$  is defined as 1/3 of the trace of the orthogonalised  $U_{\text{IJ}}$  tensor.

| Atom | <i>x</i> | <i>y</i>    | <i>z</i> | $U(\text{eq})$ |
|------|----------|-------------|----------|----------------|
| Y001 | 9114(2)  | 9260.8(9)   | 5371(2)  | 0.8(5)         |
| Y002 | 6613(2)  | 1776.4(9)   | 12865(3) | -0.2(5)        |
| Y003 | 4120(2)  | 1759.9(8)   | 10363(3) | -0.6(5)        |
| Y004 | 9111(2)  | 6772.8(9)   | 5370(2)  | -0.4(5)        |
| Y005 | 10892(2) | 5725.7(9)   | -363(3)  | -1.0(5)        |
| Y006 | 10891(3) | 5726.0(9)   | 4638(3)  | 0.1(5)         |
| Y007 | 10881(2) | 8241.3(8)   | -369(3)  | -0.3(5)        |
| Y008 | 5883(2)  | 3230.0(9)   | -362(2)  | -0.9(5)        |
| Y009 | 5883(2)  | 3225.8(9)   | 4633(2)  | -0.7(5)        |
| Y00A | 6625(2)  | 4259.3(9)   | 2871(2)  | -0.8(5)        |
| Y00B | 8390(2)  | -1772.6(9)  | 12134(2) | -0.9(5)        |
| Y00C | 3386(2)  | 726.2(9)    | 12140(3) | -0.3(5)        |
| Y00D | 4117(2)  | 1758.2(8)   | 5377(3)  | -0.5(5)        |
| Y00E | 8392(2)  | 725.6(8)    | 12138(2) | -0.5(5)        |
| Y00F | 6624(2)  | 6760.5(8)   | -2129(3) | -0.3(5)        |
| Y00G | 5879(2)  | 741.0(9)    | 4629(2)  | -0.3(5)        |
| Y00H | 9120(2)  | 9261.5(9)   | 366(2)   | -0.7(5)        |
| Y00I | 6613(2)  | -725.5(9)   | 12860(2) | -0.6(5)        |
| Y00J | 6617(2)  | 6761.8(8)   | 2865(3)  | -0.2(5)        |
| Y00K | 1605(3)  | -725.7(8)   | 12866(2) | -0.2(5)        |
| Y00L | 6626(2)  | 4259.3(9)   | 7867(2)  | -0.8(5)        |
| Y00M | 4112(3)  | 4276.0(9)   | 361(3)   | -0.5(5)        |
| Y00N | 9113(2)  | 6773.7(9)   | 362(2)   | 0.2(5)         |
| Y00O | 8380(2)  | 3238.3(8)   | 2129(3)  | -1.0(5)        |
| Y00P | 8381(2)  | 5740.8(9)   | -2869(2) | -0.6(5)        |
| Y00Q | 3386(2)  | -1774.4(9)  | 12134(2) | -0.6(5)        |
| Y00R | 8379(2)  | 3236.9(8)   | 7136(3)  | -0.3(5)        |
| Y00S | 4109(2)  | 4275.0(9)   | 5363(3)  | -0.8(5)        |
| Y00T | 10881(2) | -1760.3(8)  | 14629(3) | -1.0(5)        |
| Y00U | 5883(2)  | 740.3(9)    | 9635(2)  | 0.1(5)         |
| Y00V | 8380(2)  | 5741.4(9)   | 2131(2)  | -0.9(5)        |
| Y00W | 1610(2)  | 1774.3(9)   | 12867(2) | -0.5(5)        |
| Ge0X | -761(3)  | 1513.2(11)  | 13003(3) | 2.9(8)         |
| Ge0Y | 4239(3)  | 1512.1(11)  | 12999(3) | 1.0(8)         |
| Ge0Z | 8253(3)  | 988.6(11)   | 4505(3)  | 0.6(8)         |
| Ge10 | 10762(3) | -1510.8(11) | 11998(3) | 1.3(8)         |
| Ge11 | 10756(3) | 5987.4(13)  | 2004(3)  | 2.3(9)         |
| Ge12 | 4237(3)  | 4013.8(12)  | 8002(3)  | 0.9(8)         |
| Ge13 | 4237(3)  | -991.1(12)  | 12993(3) | 3.5(9)         |
| Ge14 | 6744(3)  | 9013.1(12)  | 500(3)   | 2.9(9)         |
| Ge15 | 10761(3) | 5991.0(12)  | -3006(3) | 3.0(8)         |



**Table S3 extended.** Fractional Atomic Coordinates ( $\times 10^4$ ) and Equivalent Isotropic Displacement Parameters ( $\text{\AA}^2 \times 10^3$ ).  $U_{\text{eq}}$  is defined as 1/3 of the trace of the orthogonalised  $U_{\text{IJ}}$  tensor.

| Atom | <i>x</i> | <i>y</i>    | <i>z</i>  | $U(\text{eq})$ |
|------|----------|-------------|-----------|----------------|
| Ge16 | 8258(3)  | 8490.4(12)  | -504(3)   | 3.7(9)         |
| Ge17 | 6743(3)  | 6511.7(11)  | 5503(3)   | 1.5(8)         |
| Ge18 | 9247(3)  | -991.3(12)  | 12990(3)  | 3.9(9)         |
| Ge19 | 8263(3)  | 5988.2(12)  | -495(3)   | 5.1(9)         |
| Ge1A | 8265(3)  | 5990.8(12)  | 4494(3)   | 4.4(9)         |
| Ge1B | 5753(3)  | 3490.2(13)  | 7000(3)   | 3.0(9)         |
| Ge1C | 9246(3)  | 6506.8(13)  | -1990(3)  | 2.1(8)         |
| Ge1D | 6749(3)  | 6509.9(11)  | 503(3)    | 1.4(8)         |
| Ge1E | 756(3)   | 993.0(12)   | 11997(3)  | 2.8(8)         |
| Ge1F | 6745(3)  | 1508.9(13)  | 10505(3)  | 3.1(9)         |
| Ge1G | 5758(3)  | -1508.5(11) | 11996(4)  | 2.5(8)         |
| Ge1H | 6737(3)  | 9012.1(12)  | 5503(3)   | 1.9(8)         |
| Ge1I | 8258(3)  | 989.0(12)   | 9498(3)   | 1.9(8)         |
| Ge1J | 9245(3)  | 6510.0(12)  | 3000(3)   | 3.4(9)         |
| Ge1K | 6744(3)  | 1509.2(12)  | 5501(3)   | 2.8(8)         |
| Ge1L | 5761(3)  | 991.0(12)   | 11993(3)  | 5.3(9)         |
| Ge1M | 8255(3)  | 8493.4(13)  | 4491(3)   | 3.8(9)         |
| Ge1N | 6743(3)  | 4005.9(12)  | 5504(3)   | 3.3(9)         |
| Ge1O | 4238(3)  | 4016.5(12)  | 3000(3)   | 3.4(9)         |
| Ge1P | 8259(3)  | 3490.7(11)  | -498(3)   | 2.6(8)         |
| Ge1Q | 8262(3)  | 3484.7(11)  | 4507(3)   | 1.9(8)         |
| Y01R | 5748(3)  | 3496.9(12)  | 2000(3)   | 9.5(7)         |
| Ge1S | 6743(3)  | 4008.7(12)  | 499(3)    | 3.9(9)         |
| Ge1T | 7391(3)  | 7511.4(15)  | -3744(4)  | 12.5(11)       |
| Ge1U | 5011(4)  | -11.9(13)   | 11172(5)  | 20.2(13)       |
| Ge1V | 4982(4)  | 4990.2(14)  | 1372(3)   | 11.1(10)       |
| Ge1W | 4890(20) | 2464(12)    | 11290(30) | 21(7)          |
| Ge1X | 7612(4)  | 2486.3(15)  | 3756(4)   | 14.0(12)       |
| Ge1Y | 7504(5)  | 12.5(14)    | 11158(4)  | 21.1(11)       |
| Ge1Z | 7600(4)  | 2509.2(14)  | 1202(5)   | 19.2(12)       |
| Ge20 | 7472(5)  | 5015.3(13)  | 1342(4)   | 15.3(12)       |
| Ge21 | 10014(5) | 5009.6(14)  | 3673(4)   | 20.1(13)       |
| Ge22 | 4991(4)  | 13.4(12)    | 13836(5)  | 16.6(11)       |
| Ge23 | 7488(4)  | 5015.2(12)  | 6330(3)   | 10.0(9)        |
| Ge24 | 7572(5)  | 2513.8(14)  | 6224(5)   | 16.4(12)       |
| Ge25 | 4927(4)  | 2490.6(13)  | 6246(5)   | 17.0(12)       |
| Ge26 | 10078(4) | 7511.6(13)  | -1260(4)  | 16.1(11)       |
| Ge28 | 10114(4) | 7489.1(14)  | 6225(4)   | 14.7(11)       |
| Ge29 | 10071(4) | 7487.5(14)  | 1235(4)   | 14.6(12)       |
| Ge2A | 7530(4)  | 4990.9(12)  | 3638(4)   | 15.1(11)       |
| Ge2B | 2485(5)  | -12.5(14)   | 13846(4)  | 17.7(14)       |

**Table S3 extended.** Fractional Atomic Coordinates ( $\times 10^4$ ) and Equivalent Isotropic Displacement Parameters ( $\text{\AA}^2 \times 10^3$ ).  $U_{\text{eq}}$  is defined as 1/3 of the trace of the orthogonalised  $U_{\text{IJ}}$  tensor.

| Atom | <i>x</i>  | <i>y</i>   | <i>z</i>  | $U(\text{eq})$ |
|------|-----------|------------|-----------|----------------|
| Ge2C | 7478(5)   | -8.9(14)   | 13859(4)  | 19.1(13)       |
| Ge2D | 2517(5)   | 10.8(14)   | 11148(4)  | 15.5(13)       |
| Ge2E | 7422(5)   | 7487.9(14) | 3764(5)   | 17.9(13)       |
| Ge2F | 22(5)     | -12.0(13)  | 11164(4)  | 15.7(12)       |
| Ge2G | 5023(4)   | 5012.0(13) | 3626(3)   | 13.2(11)       |
| Ge2H | 10004(4)  | 5011.0(14) | -1329(4)  | 14.5(11)       |
| Ge2I | 4780(40)  | 2508(6)    | 8950(40)  | 9(4)           |
| Ge2J | 7531(5)   | 4987.1(13) | -1340(4)  | 19.1(13)       |
| Ge2L | 9968(4)   | 13.2(13)   | 13839(4)  | 13.9(11)       |
| Ge2M | 7566(5)   | 2487.4(15) | 8756(5)   | 23.5(15)       |
| Ge2N | 10079(4)  | 7509.2(13) | 3733(5)   | 16.9(12)       |
| Ge2O | 7428(5)   | 7512.8(15) | 1248(5)   | 23.0(14)       |
| Fe2P | 6122(8)   | 2760(3)    | 2380(8)   | 5(2)           |
| Fe2Q | 6115(10)  | 265(3)     | 12365(10) | 5(3)           |
| Fe2R | 8888(8)   | 7235(3)    | -2370(8)  | 6(2)           |
| Fe2S | 6382(8)   | 4740(3)    | 5133(8)   | 4(2)           |
| Fe2T | 6396(8)   | 4741(3)    | 124(8)    | 6(2)           |
| Fe2U | 8601(9)   | 5268(3)    | -121(9)   | 2(2)           |
| Fe2V | 6130(9)   | 2763(4)    | 7368(9)   | 1(3)           |
| Fe2W | 8890(9)   | 7235(3)    | 2613(10)  | 3(3)           |
| Fe2X | 6392(10)  | 2236(4)    | 10146(10) | 0(3)           |
| Fe2Y | 8611(10)  | 5265(4)    | 4871(10)  | 5(3)           |
| Fe2Z | 1116(9)   | 259(3)     | 12375(9)  | 5(2)           |
| Fe30 | 6381(9)   | 2240(3)    | 5122(10)  | 4(3)           |
| Fe31 | 8904(10)  | -265(3)    | 12630(9)  | 3(2)           |
| Fe32 | 8619(9)   | 7762(3)    | 4878(9)   | 2(3)           |
| Fe33 | 3883(10)  | -267(3)    | 12615(10) | 2(3)           |
| Fe34 | 8591(11)  | 7756(4)    | -135(10)  | 7(3)           |
| Fe1  | 8850(20)  | 2231(8)    | 7640(20)  | 12(6)          |
| Fe2  | 6120(20)  | 7778(7)    | 2380(20)  | 5(5)           |
| Fe3  | 3500(50)  | 2790(20)   | 4950(40)  | 50(30)         |
| Fe9  | 11430(40) | 7233(12)   | 220(50)   | 28(13)         |
| Fe12 | 3850(50)  | 2211(16)   | 12680(50) | 20(14)         |
| Fe13 | 8880(40)  | 4720(14)   | 2660(30)  | 21(13)         |
| Fe14 | 8930(20)  | 4708(12)   | -2350(20) | 28(10)         |
| Fe6  | 6420(30)  | 7232(11)   | 100(30)   | 8(8)           |
| Fe15 | 6160(40)  | 5279(16)   | 2460(50)  | -1(12)         |
| Ge1  | 4880(3)   | 2513.3(13) | 3785(4)   | 12.8(11)       |
| Ge2  | 7410(5)   | 7489.7(14) | -1218(5)  | 15.9(12)       |
| Ge7  | 5020(20)  | 2514(5)    | 8690(20)  | 6(2)           |
| Ge8  | 4953(13)  | 2500(5)    | 11226(15) | 24(4)          |

**Table S3 extended.** Fractional Atomic Coordinates ( $\times 10^4$ ) and Equivalent Isotropic Displacement Parameters ( $\text{\AA}^2 \times 10^3$ ).  $U_{\text{eq}}$  is defined as 1/3 of the trace of the orthogonalised  $U_{ij}$  tensor.

| <b>Atom</b> | <b>x</b>   | <b>y</b> | <b>z</b>  | <b>U(eq)</b> |
|-------------|------------|----------|-----------|--------------|
| Fe19        | 8550(40)   | 278(15)  | 14860(40) | 4(11)        |
| Fe7         | 6490(40)   | -320(15) | 10190(50) | 19(15)       |
| Fe4         | 6520(40)   | -255(16) | 15090(40) | 0(12)        |
| Fe10        | 11450(70)  | 7779(12) | -2750(40) | 90(30)       |
| Fe8         | 11580(160) | 7200(20) | 4990(60)  | 200(80)      |
| Fe11        | 1630(80)   | -292(18) | 10090(50) | 50(30)       |

**Table 3 extended.** Anisotropic Displacement Parameters ( $\text{\AA}^2 \times 10^3$ ). The Anisotropic displacement factor exponent takes the form:  $-2\pi^2[h^2a^2U_{11}+2hka^*b^*U_{12}+\dots]$ .

| Atom | $U_{11}$ | $U_{22}$ | $U_{33}$ | $U_{23}$ | $U_{13}$ | $U_{12}$ |
|------|----------|----------|----------|----------|----------|----------|
| Y001 | 0.7(10)  | 1.4(11)  | 0.4(11)  | 0.5(10)  | 0.6(8)   | -1.5(9)  |
| Y002 | -0.3(10) | -0.8(11) | 0.6(11)  | -0.4(9)  | 1.0(8)   | -0.2(9)  |
| Y003 | -0.3(10) | -0.3(11) | -1.0(10) | 0.3(10)  | -0.1(8)  | -0.5(9)  |
| Y004 | -0.6(10) | 0.7(11)  | -0.7(11) | -0.5(9)  | 0.3(8)   | -0.6(9)  |
| Y005 | -1.0(9)  | -0.9(11) | -1.0(10) | 0.2(9)   | 0.0(7)   | 0.1(9)   |
| Y006 | -0.9(9)  | 2.2(11)  | -0.9(10) | -0.5(10) | 0.1(7)   | -0.3(9)  |
| Y007 | 0.3(10)  | -0.4(10) | -0.5(10) | -0.3(10) | 0.8(8)   | -0.7(9)  |
| Y008 | -1.0(10) | -1.0(11) | -0.8(11) | 0.2(9)   | 0.0(8)   | 0.2(9)   |
| Y009 | -1.0(10) | -0.5(12) | -0.9(11) | 0.4(9)   | 0.0(8)   | 0.2(9)   |
| Y00A | -0.8(10) | -1.0(11) | -0.7(11) | 0.1(10)  | 0.3(8)   | 0.1(9)   |
| Y00B | -1.0(10) | -0.6(11) | -0.9(11) | 0.0(9)   | 0.0(8)   | 0.1(9)   |
| Y00C | -0.9(10) | -0.4(11) | -0.2(11) | 0.9(10)  | 0.3(8)   | 0.4(9)   |
| Y00D | -0.3(10) | -0.8(11) | -0.1(10) | -0.3(10) | 0.8(8)   | -0.3(9)  |
| Y00E | -0.5(10) | 0.1(11)  | -0.9(10) | -0.1(10) | 0.2(8)   | -0.6(9)  |
| Y00F | -0.1(10) | 0.2(11)  | -0.5(10) | -0.3(10) | 0.6(8)   | -0.7(9)  |
| Y00G | -0.2(10) | 0.1(11)  | -0.7(10) | 0.5(9)   | 0.2(8)   | -0.3(9)  |
| Y00H | -1.0(10) | -0.4(11) | -0.8(10) | 0.3(9)   | 0.1(8)   | 0.2(9)   |
| Y00I | -1.0(10) | 0.1(11)  | -1.0(10) | 0.3(10)  | 0.0(8)   | -0.1(9)  |
| Y00J | -1.0(10) | 1.1(11)  | -0.9(10) | 0.6(10)  | 0.0(8)   | -0.1(9)  |
| Y00K | -0.2(10) | -0.6(11) | 0.1(10)  | 0.8(10)  | -0.5(8)  | -0.3(9)  |
| Y00L | -0.6(10) | -1.0(11) | -0.7(11) | 0.2(10)  | 0.3(8)   | 0.2(9)   |
| Y00M | -0.5(9)  | 0.3(11)  | -1.0(10) | 0.1(10)  | 0.1(7)   | -0.6(10) |
| Y00N | -0.3(10) | 2.2(11)  | -0.9(11) | -0.3(10) | 0.2(8)   | -1.4(9)  |
| Y00O | -1.0(10) | -0.9(10) | -1.0(10) | 0.2(10)  | 0.0(8)   | 0.2(9)   |
| Y00P | -1.0(10) | 0.0(11)  | -0.5(11) | -0.6(10) | 0.1(8)   | 0.0(9)   |
| Y00Q | -1.0(10) | -0.5(11) | -0.5(11) | 0.7(9)   | 0.1(8)   | 0.3(9)   |
| Y00R | -0.4(10) | -1.0(10) | 0.6(10)  | 0.0(10)  | 1.0(8)   | 0.1(9)   |
| Y00S | -0.8(9)  | -0.5(11) | -0.9(10) | 0.0(10)  | 0.1(7)   | -0.1(9)  |
| Y00T | -1.0(10) | -1.0(10) | -1.0(10) | 0.2(10)  | 0.0(8)   | 0.2(9)   |
| Y00U | -0.3(10) | -0.2(11) | 0.5(11)  | 1.3(10)  | -1.0(8)  | -0.6(9)  |
| Y00V | -1.0(10) | -0.8(11) | -0.9(11) | 0.3(10)  | 0.0(8)   | 0.1(9)   |
| Y00W | -1.0(10) | 0.5(11)  | -1.0(11) | 0.1(9)   | 0.0(8)   | 0.1(9)   |
| Ge0X | 1.6(14)  | 6.0(16)  | 1.1(13)  | 0.5(14)  | 1.8(10)  | -2.2(13) |
| Ge0Y | -0.9(13) | 3.9(16)  | -0.9(13) | 0.9(13)  | 0.1(9)   | 0.7(12)  |
| Ge0Z | -0.3(13) | 2.6(17)  | -0.4(14) | -0.7(12) | -0.5(10) | 0.1(12)  |
| Ge10 | 0.2(13)  | 4.8(15)  | -0.8(13) | -0.9(13) | 0.1(9)   | -0.8(12) |
| Ge11 | 0.5(14)  | 7.2(19)  | -0.2(15) | -0.2(13) | 0.8(10)  | -2.5(12) |
| Ge12 | -0.3(14) | 3.6(17)  | -0.4(14) | -0.4(13) | 0.6(10)  | -1.0(12) |
| Ge13 | 0.4(14)  | 8.4(18)  | 2.0(15)  | -1.6(14) | 1.0(10)  | -1.2(13) |

**Table 3 extended.** Anisotropic Displacement Parameters ( $\text{\AA}^2 \times 10^3$ ). The Anisotropic displacement factor exponent takes the form:  $-2\pi^2[h^2a^{*2}U_{11}+2hka^*b^*U_{12}+\dots]$ .

| Atom | $U_{11}$ | $U_{22}$ | $U_{33}$ | $U_{23}$ | $U_{13}$ | $U_{12}$ |
|------|----------|----------|----------|----------|----------|----------|
| Ge14 | 1.2(15)  | 5.8(18)  | 2.7(16)  | -0.6(13) | 0.1(11)  | -3.7(13) |
| Ge15 | 0.5(13)  | 9.6(17)  | -0.4(14) | -1.2(13) | 1.0(10)  | -2.3(12) |
| Ge16 | 3.2(14)  | 6.6(17)  | 1.7(15)  | -0.3(13) | -0.8(10) | -2.6(13) |
| Ge17 | -0.3(14) | 4.7(16)  | -0.3(14) | 0.0(14)  | 0.7(10)  | 0.3(13)  |
| Ge18 | 0.3(14)  | 10.4(19) | 1.6(15)  | -2.7(14) | -0.4(10) | -0.4(14) |
| Ge19 | 1.8(14)  | 12.7(18) | 1.3(14)  | 0.0(14)  | 0.1(10)  | -4.1(13) |
| Ge1A | 0.6(13)  | 12.9(18) | 1.2(14)  | -4.9(14) | 1.4(10)  | -1.6(13) |
| Ge1B | 0.8(14)  | 9.7(19)  | -0.5(15) | -2.1(14) | 0.5(11)  | -2.3(13) |
| Ge1C | -0.7(14) | 8.3(18)  | -0.5(15) | -1.8(13) | 0.4(10)  | -1.2(13) |
| Ge1D | 1.3(13)  | 4.9(15)  | -1.0(13) | 0.0(13)  | 0.1(10)  | -3.5(12) |
| Ge1E | -0.4(13) | 9.9(18)  | -0.2(14) | -2.2(14) | 0.7(10)  | -1.9(13) |
| Ge1F | -0.5(14) | 8.6(18)  | 1.6(16)  | -1.4(14) | 1.0(11)  | -1.6(13) |
| Ge1G | 0.3(14)  | 7.7(17)  | -0.5(14) | 0.8(14)  | 0.2(10)  | -1.9(13) |
| Ge1H | 1.4(14)  | 5.3(17)  | 0.2(14)  | -1.2(13) | 1.5(10)  | -3.2(12) |
| Ge1I | 0.9(14)  | 3.6(17)  | 1.5(15)  | -0.7(13) | 2.0(10)  | -1.4(12) |
| Ge1J | -0.2(14) | 9.2(18)  | 1.5(15)  | -1.7(14) | 1.4(10)  | -0.9(13) |
| Ge1K | -0.5(13) | 8.0(17)  | 1.0(15)  | -0.4(13) | 0.6(10)  | -1.7(12) |
| Ge1L | 2.6(14)  | 13.2(19) | 0.9(15)  | 0.0(14)  | 2.0(10)  | -4.6(14) |
| Ge1M | 2.6(14)  | 9.1(18)  | -0.2(15) | -1.0(14) | 1.7(10)  | -1.5(13) |
| Ge1N | 0.3(14)  | 9.7(18)  | -0.1(15) | 0.5(14)  | 0.8(10)  | -2.0(13) |
| Ge1O | 0.4(14)  | 8.1(17)  | 1.1(14)  | 1.2(12)  | 1.3(10)  | -1.5(12) |
| Ge1P | 0.8(14)  | 6.3(16)  | 0.7(14)  | -0.3(13) | 1.5(10)  | -1.3(13) |
| Ge1Q | 0.6(13)  | 5.5(15)  | 0.1(13)  | -1.0(13) | 1.2(9)   | -1.3(12) |
| Y01R | 2.2(12)  | 20.4(18) | 6.4(13)  | -2.8(13) | 3.9(10)  | -3.3(12) |
| Ge1S | 1.4(14)  | 10.5(18) | 0.8(14)  | -1.2(14) | 1.8(10)  | -3.6(13) |
| Ge1T | 2.3(17)  | 9(2)     | 27(2)    | -4.1(18) | -0.7(15) | -2.6(14) |
| Ge1U | 24(2)    | 6.5(18)  | 28(3)    | -3.4(17) | -4.8(18) | 4.8(17)  |
| Ge1V | 20(2)    | 12(2)    | 2.1(15)  | 0.8(14)  | 6.5(13)  | -8.0(16) |
| Ge1W | 8(9)     | 26(14)   | 29(11)   | 2(9)     | 13(12)   | -9(8)    |
| Ge1X | 3.4(18)  | 9(2)     | 31(3)    | -4.7(18) | 0.5(16)  | -1.8(15) |
| Ge1Y | 42(3)    | 10(2)    | 12(2)    | -3.6(16) | -1.2(18) | -3.9(18) |
| Ge1Z | 16.8(19) | 8.1(19)  | 30(2)    | 3.1(18)  | -2.2(15) | -2.5(15) |
| Ge20 | 30(3)    | 6.1(18)  | 7.0(17)  | -1.2(15) | -1.5(15) | 5.4(17)  |
| Ge21 | 33(3)    | 7.3(18)  | 20(2)    | -2.4(16) | -9.9(19) | -1.7(18) |
| Ge22 | 26(2)    | 4.2(17)  | 18(2)    | -3.7(15) | -5.0(16) | 5.6(15)  |
| Ge23 | 10.3(17) | 11.7(18) | 5.6(15)  | 0.0(14)  | 8.2(12)  | 1.5(14)  |
| Ge24 | 18(2)    | 3.2(18)  | 26(2)    | 1.2(17)  | -4.0(16) | 1.1(16)  |
| Ge25 | 12.7(18) | 6.3(18)  | 30(3)    | 0.5(18)  | -6.5(16) | 1.4(15)  |
| Ge26 | 2.2(14)  | 10.9(19) | 33(3)    | 1.3(18)  | 6.5(13)  | -2.6(14) |

**Table 3 extended.** Anisotropic Displacement Parameters ( $\text{\AA}^2 \times 10^3$ ). The Anisotropic displacement factor exponent takes the form:  $-2\pi^2[h^2a^*2U_{11}+2hka^*b^*U_{12}+\dots]$ .

| Atom | $U_{11}$ | $U_{22}$ | $U_{33}$ | $U_{23}$ | $U_{13}$  | $U_{12}$ |
|------|----------|----------|----------|----------|-----------|----------|
| Ge28 | 3.3(16)  | 9.0(19)  | 32(2)    | -8.1(18) | 3.8(14)   | 1.5(14)  |
| Ge29 | 12.8(19) | 4.1(19)  | 26(2)    | -3.5(17) | -2.4(15)  | 2.1(15)  |
| Ge2A | 24(2)    | 6.6(17)  | 12.8(18) | -2.2(15) | -3.7(15)  | 4.7(15)  |
| Ge2B | 33(3)    | 5.5(19)  | 15(2)    | -4.1(16) | -6(2)     | -1.4(18) |
| Ge2C | 36(3)    | 5.6(19)  | 16(2)    | 0.6(16)  | -5.9(19)  | -5.2(18) |
| Ge2D | 29(3)    | 1.6(19)  | 16(3)    | 0.4(16)  | -1.7(19)  | -3.0(17) |
| Ge2E | 16(2)    | 5.9(19)  | 30(3)    | 3.3(19)  | 0.2(17)   | -3.8(17) |
| Ge2F | 24(3)    | 6.7(19)  | 14(2)    | -3.8(16) | -4.9(18)  | 4.6(17)  |
| Ge2G | 32(3)    | 8.5(18)  | 0.3(15)  | -1.5(13) | 6.4(14)   | -7.4(17) |
| Ge2H | 19(2)    | 6.7(19)  | 20(2)    | -5.2(16) | 0.4(15)   | -5.4(15) |
| Ge2I | 14(7)    | -1(4)    | 13(8)    | 0(4)     | 15(6)     | 0(4)     |
| Ge2J | 38(3)    | 3.1(18)  | 14.4(19) | -2.2(16) | -11.3(17) | 3.2(19)  |
| Ge2L | 19(2)    | 6.7(18)  | 13(2)    | -3.4(15) | 0.9(16)   | 5.4(15)  |
| Ge2M | 34(3)    | 2.4(19)  | 34(3)    | -8.0(19) | -13(2)    | 5.0(18)  |
| Ge2N | 11.7(18) | 5.0(19)  | 32(3)    | 1.6(18)  | -13.7(16) | 1.7(15)  |
| Ge2O | 39(3)    | 1.7(19)  | 29(3)    | -4.5(18) | -8(2)     | -1.9(18) |
| Fe2P | 4(3)     | 13(5)    | 0(4)     | -3(3)    | 2(3)      | -5(3)    |
| Fe2Q | 8(4)     | 4(5)     | 3(5)     | 1(4)     | -4(3)     | -6(4)    |
| Fe2R | 5(4)     | 7(4)     | 5(4)     | 1(3)     | 6(3)      | -1(3)    |
| Fe2S | 2(3)     | 9(4)     | 1(4)     | -2(3)    | 3(3)      | -1(3)    |
| Fe2T | 3(3)     | 11(4)    | 3(4)     | -1(3)    | 4(2)      | 0(3)     |
| Fe2U | 1(4)     | 4(4)     | 2(4)     | 2(3)     | -2(3)     | -2(3)    |
| Fe2V | 4(4)     | -1(5)    | 1(5)     | 1(4)     | -3(3)     | -1(3)    |
| Fe2W | 1(4)     | 0(5)     | 7(5)     | 0(4)     | -1(3)     | 1(3)     |
| Fe2X | -1(5)    | 0(5)     | 0(5)     | 1(4)     | 1(4)      | 1(4)     |
| Fe2Y | 1(4)     | 10(6)    | 4(5)     | 3(4)     | -3(3)     | -1(4)    |
| Fe2Z | 1(4)     | 9(5)     | 3(4)     | 1(3)     | 3(3)      | 0(3)     |
| Fe30 | 0(4)     | 2(4)     | 9(5)     | 1(4)     | -2(3)     | -2(3)    |
| Fe31 | 10(4)    | 0(4)     | -1(4)    | 0(3)     | 1(3)      | -3(4)    |
| Fe32 | -1(4)    | 3(5)     | 3(5)     | 4(4)     | 1(3)      | 1(3)     |
| Fe33 | 2(4)     | -1(5)    | 5(5)     | -1(4)    | 5(3)      | -1(3)    |
| Fe34 | 13(5)    | 5(6)     | 0(5)     | 1(4)     | 3(4)      | 7(4)     |
| Fe1  | 5(9)     | 15(13)   | 10(9)    | 9(9)     | 8(6)      | 3(9)     |
| Fe2  | -1(8)    | 3(9)     | 11(10)   | -1(8)    | 2(7)      | 0(7)     |
| Fe3  | 20(30)   | 90(60)   | 10(20)   | 10(20)   | 5(16)     | 50(30)   |
| Fe9  | 17(17)   | 3(16)    | 60(30)   | 16(18)   | -34(17)   | -8(13)   |
| Fe12 | 30(30)   | 0(20)    | 20(20)   | 4(18)    | 20(17)    | 10(20)   |
| Fe13 | 40(30)   | 20(20)   | 0(16)    | 3(15)    | -2(14)    | 4(18)    |
| Fe14 | 0(10)    | 80(30)   | -1(11)   | 2(12)    | 0(8)      | -7(11)   |

**Table 3 extended.** Anisotropic Displacement Parameters ( $\text{\AA}^2 \times 10^3$ ). The Anisotropic displacement factor exponent takes the form:  $-2\pi^2[h^2a^2U_{11}+2hka^*b^*U_{12}+\dots]$ .

| Atom | $U_{11}$ | $U_{22}$ | $U_{33}$ | $U_{23}$ | $U_{13}$ | $U_{12}$ |
|------|----------|----------|----------|----------|----------|----------|
| Fe6  | -1(13)   | 17(16)   | 6(14)    | 5(12)    | 0(10)    | -1(11)   |
| Fe15 | 0(20)    | 0(20)    | 0(20)    | 0(17)    | 0(16)    | 0(15)    |
| Ge1  | 4.5(16)  | 6.0(18)  | 28(2)    | -5.8(16) | -1.5(14) | 0.3(14)  |
| Ge2  | 12(2)    | 6.5(19)  | 26(2)    | 1.6(18)  | -4.9(15) | 1.4(16)  |
| Ge7  | 4(5)     | 12(4)    | 4(5)     | -4(3)    | 5(4)     | -3(3)    |
| Ge8  | 28(7)    | 1(5)     | 41(8)    | -6(4)    | -29(8)   | 7(4)     |
| Fe19 | 10(20)   | 0(19)    | -1(19)   | 0(15)    | -1(14)   | -4(14)   |
| Fe7  | 0(20)    | 8(19)    | 40(30)   | 5(18)    | 10(20)   | 3(15)    |
| Fe4  | -1(18)   | 0(20)    | 1(19)    | 2(14)    | 0(14)    | 1(14)    |
| Fe10 | 240(80)  | 0(15)    | 40(20)   | -5(14)   | -90(40)  | 10(30)   |
| Fe8  | 600(200) | 10(30)   | 20(30)   | 10(20)   | -120(60) | -70(70)  |
| Fe11 | 110(80)  | 10(20)   | 40(30)   | 10(20)   | 30(40)   | -10(30)  |

**Table S4.** Atomic coordinates for the  $\sqrt{2}\times\sqrt{2}$  supercell of the orthorhombic *Cmcm* structure with a formula of  $Y_4Fe_{1.5}Ge_8$  used in DFT calculations.

|    |    |      | x       | y       | z       | Occ.  | U     | Site | Sym. |
|----|----|------|---------|---------|---------|-------|-------|------|------|
| 1  | Y  | Y1   | 0.62500 | 0.87500 | 0.39728 | 1.000 | 0.000 | 1a   | 1    |
| 2  | Y  | Y2   | 0.12500 | 0.37500 | 0.39728 | 1.000 | 0.000 | 1a   | 1    |
| 3  | Y  | Y3   | 0.37500 | 0.12500 | 0.60272 | 1.000 | 0.000 | 1a   | 1    |
| 4  | Y  | Y4   | 0.87500 | 0.62500 | 0.60272 | 1.000 | 0.000 | 1a   | 1    |
| 5  | Y  | Y5   | 0.37500 | 0.62500 | 0.89728 | 1.000 | 0.000 | 1a   | 1    |
| 6  | Y  | Y6   | 0.87500 | 0.12500 | 0.89728 | 1.000 | 0.000 | 1a   | 1    |
| 7  | Y  | Y7   | 0.12500 | 0.87500 | 0.10272 | 1.000 | 0.000 | 1a   | 1    |
| 8  | Y  | Y8   | 0.62500 | 0.37500 | 0.10272 | 1.000 | 0.000 | 1a   | 1    |
| 9  | Ge | Ge1  | 0.12500 | 0.87500 | 0.44766 | 1.000 | 0.000 | 1a   | 1    |
| 10 | Ge | Ge2  | 0.62500 | 0.37500 | 0.44766 | 1.000 | 0.000 | 1a   | 1    |
| 11 | Ge | Ge3  | 0.37500 | 0.62500 | 0.55234 | 1.000 | 0.000 | 1a   | 1    |
| 12 | Ge | Ge4  | 0.87500 | 0.12500 | 0.55234 | 1.000 | 0.000 | 1a   | 1    |
| 13 | Ge | Ge5  | 0.37500 | 0.12500 | 0.94766 | 1.000 | 0.000 | 1a   | 1    |
| 14 | Ge | Ge6  | 0.87500 | 0.62500 | 0.94766 | 1.000 | 0.000 | 1a   | 1    |
| 15 | Ge | Ge7  | 0.62500 | 0.87500 | 0.05234 | 1.000 | 0.000 | 1a   | 1    |
| 16 | Ge | Ge8  | 0.12500 | 0.37500 | 0.05234 | 1.000 | 0.000 | 1a   | 1    |
| 17 | Ge | Ge9  | 0.37500 | 0.62500 | 0.25175 | 1.000 | 0.000 | 1a   | 1    |
| 18 | Ge | Ge10 | 0.87500 | 0.12500 | 0.25175 | 1.000 | 0.000 | 1a   | 1    |
| 19 | Ge | Ge11 | 0.12500 | 0.87500 | 0.74825 | 1.000 | 0.000 | 1a   | 1    |
| 20 | Ge | Ge12 | 0.62500 | 0.37500 | 0.74825 | 1.000 | 0.000 | 1a   | 1    |
| 21 | Ge | Ge13 | 0.62500 | 0.87500 | 0.75175 | 1.000 | 0.000 | 1a   | 1    |
| 22 | Ge | Ge14 | 0.12500 | 0.37500 | 0.75175 | 1.000 | 0.000 | 1a   | 1    |
| 23 | Ge | Ge15 | 0.37500 | 0.12500 | 0.24825 | 1.000 | 0.000 | 1a   | 1    |
| 24 | Ge | Ge16 | 0.87500 | 0.62500 | 0.24825 | 1.000 | 0.000 | 1a   | 1    |
| 25 | Fe | Fe1  | 0.12500 | 0.87500 | 0.30308 | 1.000 | 0.000 | 1a   | 1    |
| 26 | Fe | Fe2  | 0.62500 | 0.37500 | 0.30308 | 1.000 | 0.000 | 1a   | 1    |
| 27 | Fe | Fe3  | 0.37500 | 0.62500 | 0.69692 | 1.000 | 0.000 | 1a   | 1    |

## Reference

1. M. A. Zhuravleva, D. Bilc, R. J. Pcionek, S. Mahanti and M. G. Kanatzidis, *Inorganic chemistry*, 2005, **44**, 2177-2188.
2. J.-K. Bao, H. Zheng, J. Wen, S. Ramakrishnan, H. Zheng, J. S. Jiang, D. Bugaris, G. Cao, D. Y. Chung, S. van Smaalen and M. G. Kanatzidis, *Chemistry of Materials*, 2021, **33**, 7839-7847.
